# Supplementary material
Source: publisher figshare collection journal article supplement (https://karger.figshare.com/articles/dataset/_/9751793)
Supplement: Supplementary file 2 [file 1]

## **APPENDIX S1:**

### **PHYSICIAN INTERVIEW GUIDE**

#### **eConsult Platform**

1. What are your general thoughts about the eConsult system?
2. What is your preferred mode of alert when receiving an eConsult or response from the system?
3. How would you want to access information or other related patient information?

#### **Perceived effect on clinical workflow**

1. How would the implementation of this system affect your workflow?
2. How would you integrate the proposed system to your daily clinical workflow?
3. How will this affect the clinic visit?
4. Who do you think should be responsible for following up with eConsult cases?
5. Who should be responsible for arranging follow up phone calls? Needed referrals?  
Recommended tests?

#### **Overall Perceptions of the System (perceived benefits and barriers)**

1. What are your overall impressions of the proposed system?
2. What are the strengths about the system?
3. What do think might be the limitations?
4. What would prevent you from using the system in your practice?
5. How can we overcome these barriers [how can we make the system better suited to you and your patients' needs]?
6. How would implementing the system on a larger scale affect how you manage your patients?

#### **Management of Kidney Disease (Primary Care Physician)**

1. How did using eConsult affect your access to a nephrologist?
2. How did using eConsult affect your knowledge about kidney disease or patients at risk for kidney disease?
3. How did using eConsult affect your overall management of patients with or at risk of kidney disease?
4. What are your thoughts of eConsult's impact on a wider population of patients with kidney disease if it were available to all practitioners?

## **SURVEY QUESTIONS:**

1. Were you satisfied with using eConsult? (Choose one)
  - Yes it was excellent
  - Good (but with some improvement)
  - Not satisfied
2. How much time did you spend using eConsult? (Choose one)
  - More than expected
  - Less than expected
  - About the right time
3. What was difficult about eConsult? (Choose one)
  - eConsult does not link to my EMR
  - I cannot easily send an attachment
  - I have to type or re-type all patient demographics OR cut and paste which takes too long
  - I need an answer quickly
  - I am not sure how or when to check for feedback from a specialist
  - Other (please specify)
4. What went well with eConsult? (Open ended free text)
5. What can be improved with the eConsult platform? (Open ended free text)
6. How would you rate the quality of the eConsult questions received (nephrologists)? Quality of the responses (PCPs)? (Choose one)
  - Excellent and complete
  - Good, mostly complete
  - Fair, some information still required
  - Poor and incomplete
7. What can improve adoption of eConsult? (Open ended free text)
