# Supplementary material
Source: publisher figshare collection journal article supplement (https://karger.figshare.com/articles/dataset/_/9751793)
Supplement: Supplementary file 3 [file 1]

Archive with 2 entries (2 files):
- 502602_sm1.pdf
- 502602_sm2.pdf
